# Supplementary material for: Integrated genomic and functional analyses of human skin-associated Staphylococcus reveals extensive inter- and intra-species diversity
Source: PubMed Central journal article supplement (PMC10370188; doi:10.1101/2023.06.22.546190), 2023-06-23
Supplement: media-1.pdf [file media-1.pdf]

## Supporting Information for

# Integrated genomic and functional analyses of human skin-associated *Staphylococcus* reveals extensive inter- and intra-species diversity

Payal Joglekar <sup>a</sup>, Sean Conlan <sup>a</sup>, Shih-Queen Lee-Lin <sup>a</sup>, Clay Deming <sup>a</sup>, Sara Saheb Kashaf <sup>a</sup>, NISC Comparative Sequencing Program <sup>b</sup>, Heidi H. Kong <sup>c</sup>, Julia A. Segre <sup>a†</sup>

<sup>a</sup> Microbial Genomics Section, Translational and Functional Genomics Branch, NHGRI, NIH, Bethesda, Maryland, USA

<sup>b</sup> NIH Intramural Sequencing Center, NHGRI, NIH, Rockville, Maryland, USA

<sup>c</sup> Cutaneous Microbiome and Inflammation Section, NIAMS, NIH, Bethesda, Maryland, USA

† Corresponding author

**Julia A. Segre**

Building 49, Room 4a26,

49 Convent Dr. 4442,

Bethesda, MD 20892-4442

(301) 402-2314

[jsegre@nhgri.nih.gov](mailto:jsegre@nhgri.nih.gov)

**This PDF file includes:**

- Figures S1 to S10
- Tables S1, S5, S8 and S9
- Legends for Datasets S2, S3, S4, S6, S7, S10
- SI References

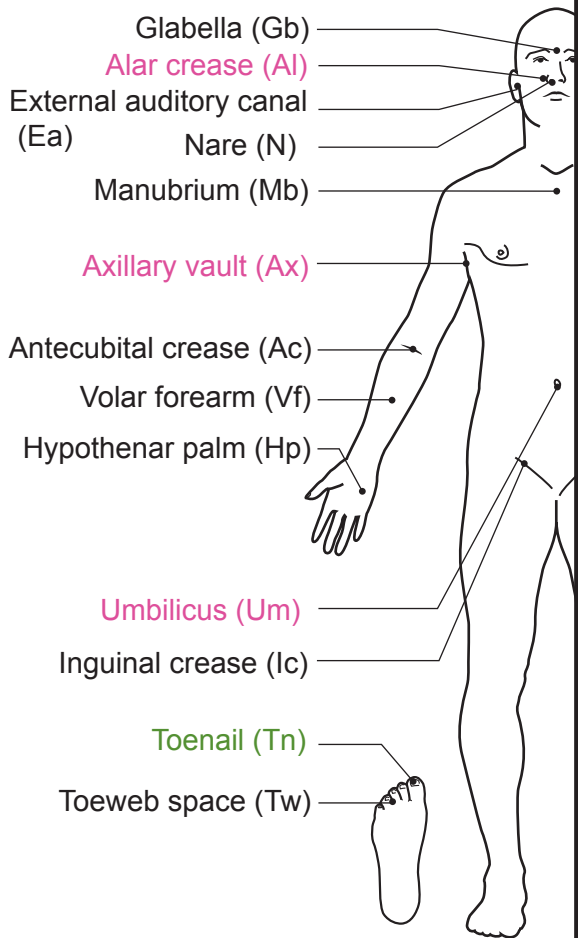

Front

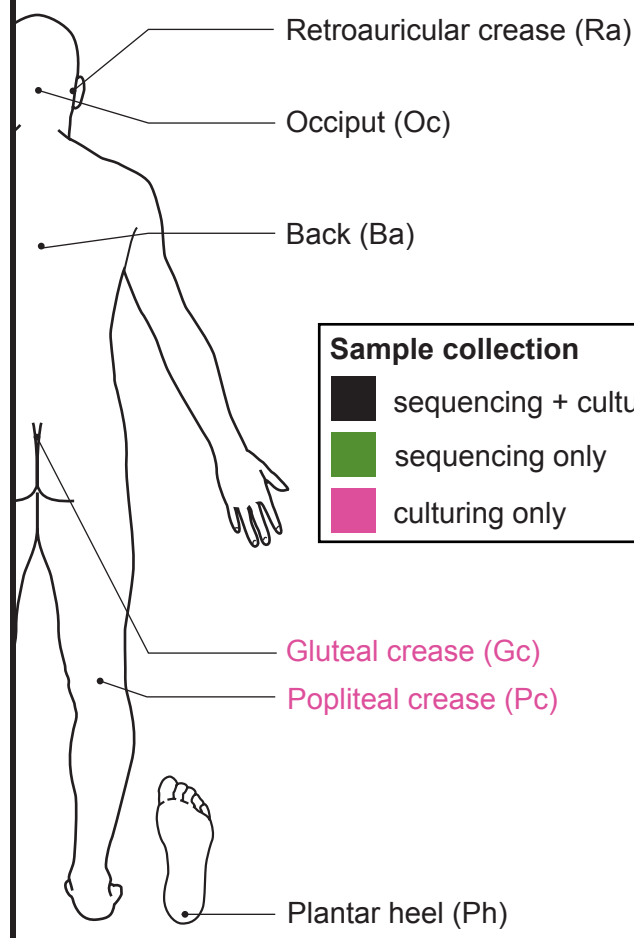

Back

**Sample collection**

- sequencing + culturing
- sequencing only
- culturing only

**Figure S1. Body sites used for collecting samples from healthy volunteers for 16S rRNA amplicon sequencing and culturing of staphylococcal isolates.**

Sites shown in black represent those for which both types of samples were collected. Toenail samples (green) were only collected for sequencing. Umbilicus, Gluteal crease, and Popliteal crease samples (all pink) were collected for culturing alone. Abbreviation shown in a bracket next to each body site were used to denote the site throughout the manuscript.

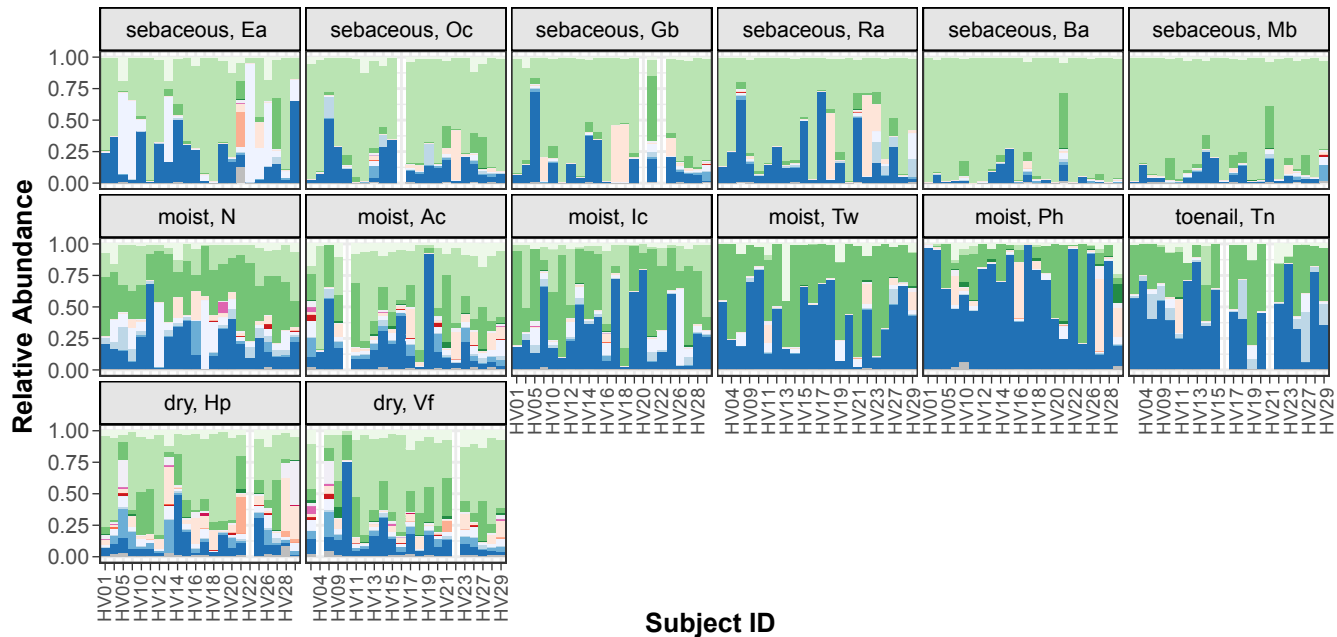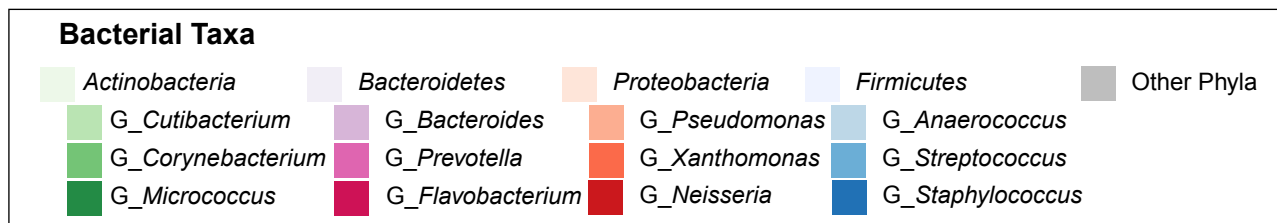

**Figure S2. Bacterial diversity on healthy human skin represented by major phyla and genera colonizing distinct body sites.**

Barplots display the relative abundance of major bacterial taxa at various body sites as displayed by facets. Colors represent taxa as shown in the accompanying legend. Each bar represents one volunteer. Empty bars represent missing data. Refer to Fig. S1 for body site abbreviation.

Mean Relative Abundance

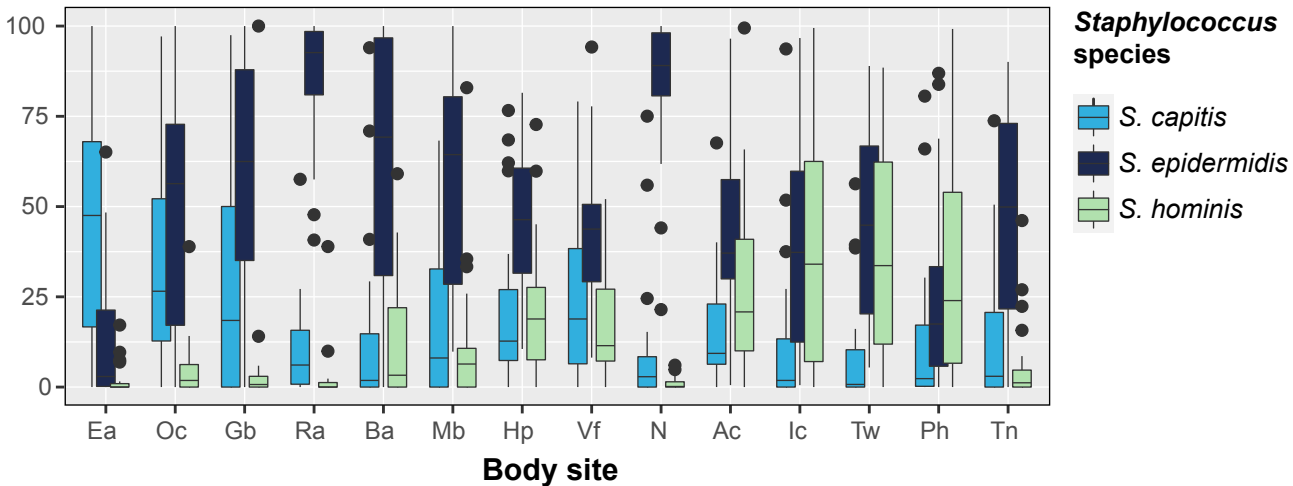

**Figure S3. Mean relative abundance (MRA) of the three most prominent species within staphylococcal communities**

Boxplots represents the MRA of the three staphylococcal species across all body sites as shown on the x-axis. Boxplot colors represent individual species. The center black line within each boxplot represents the median value, with edges showing the first and third quartiles. Refer to Fig. S1 for body site abbreviation.



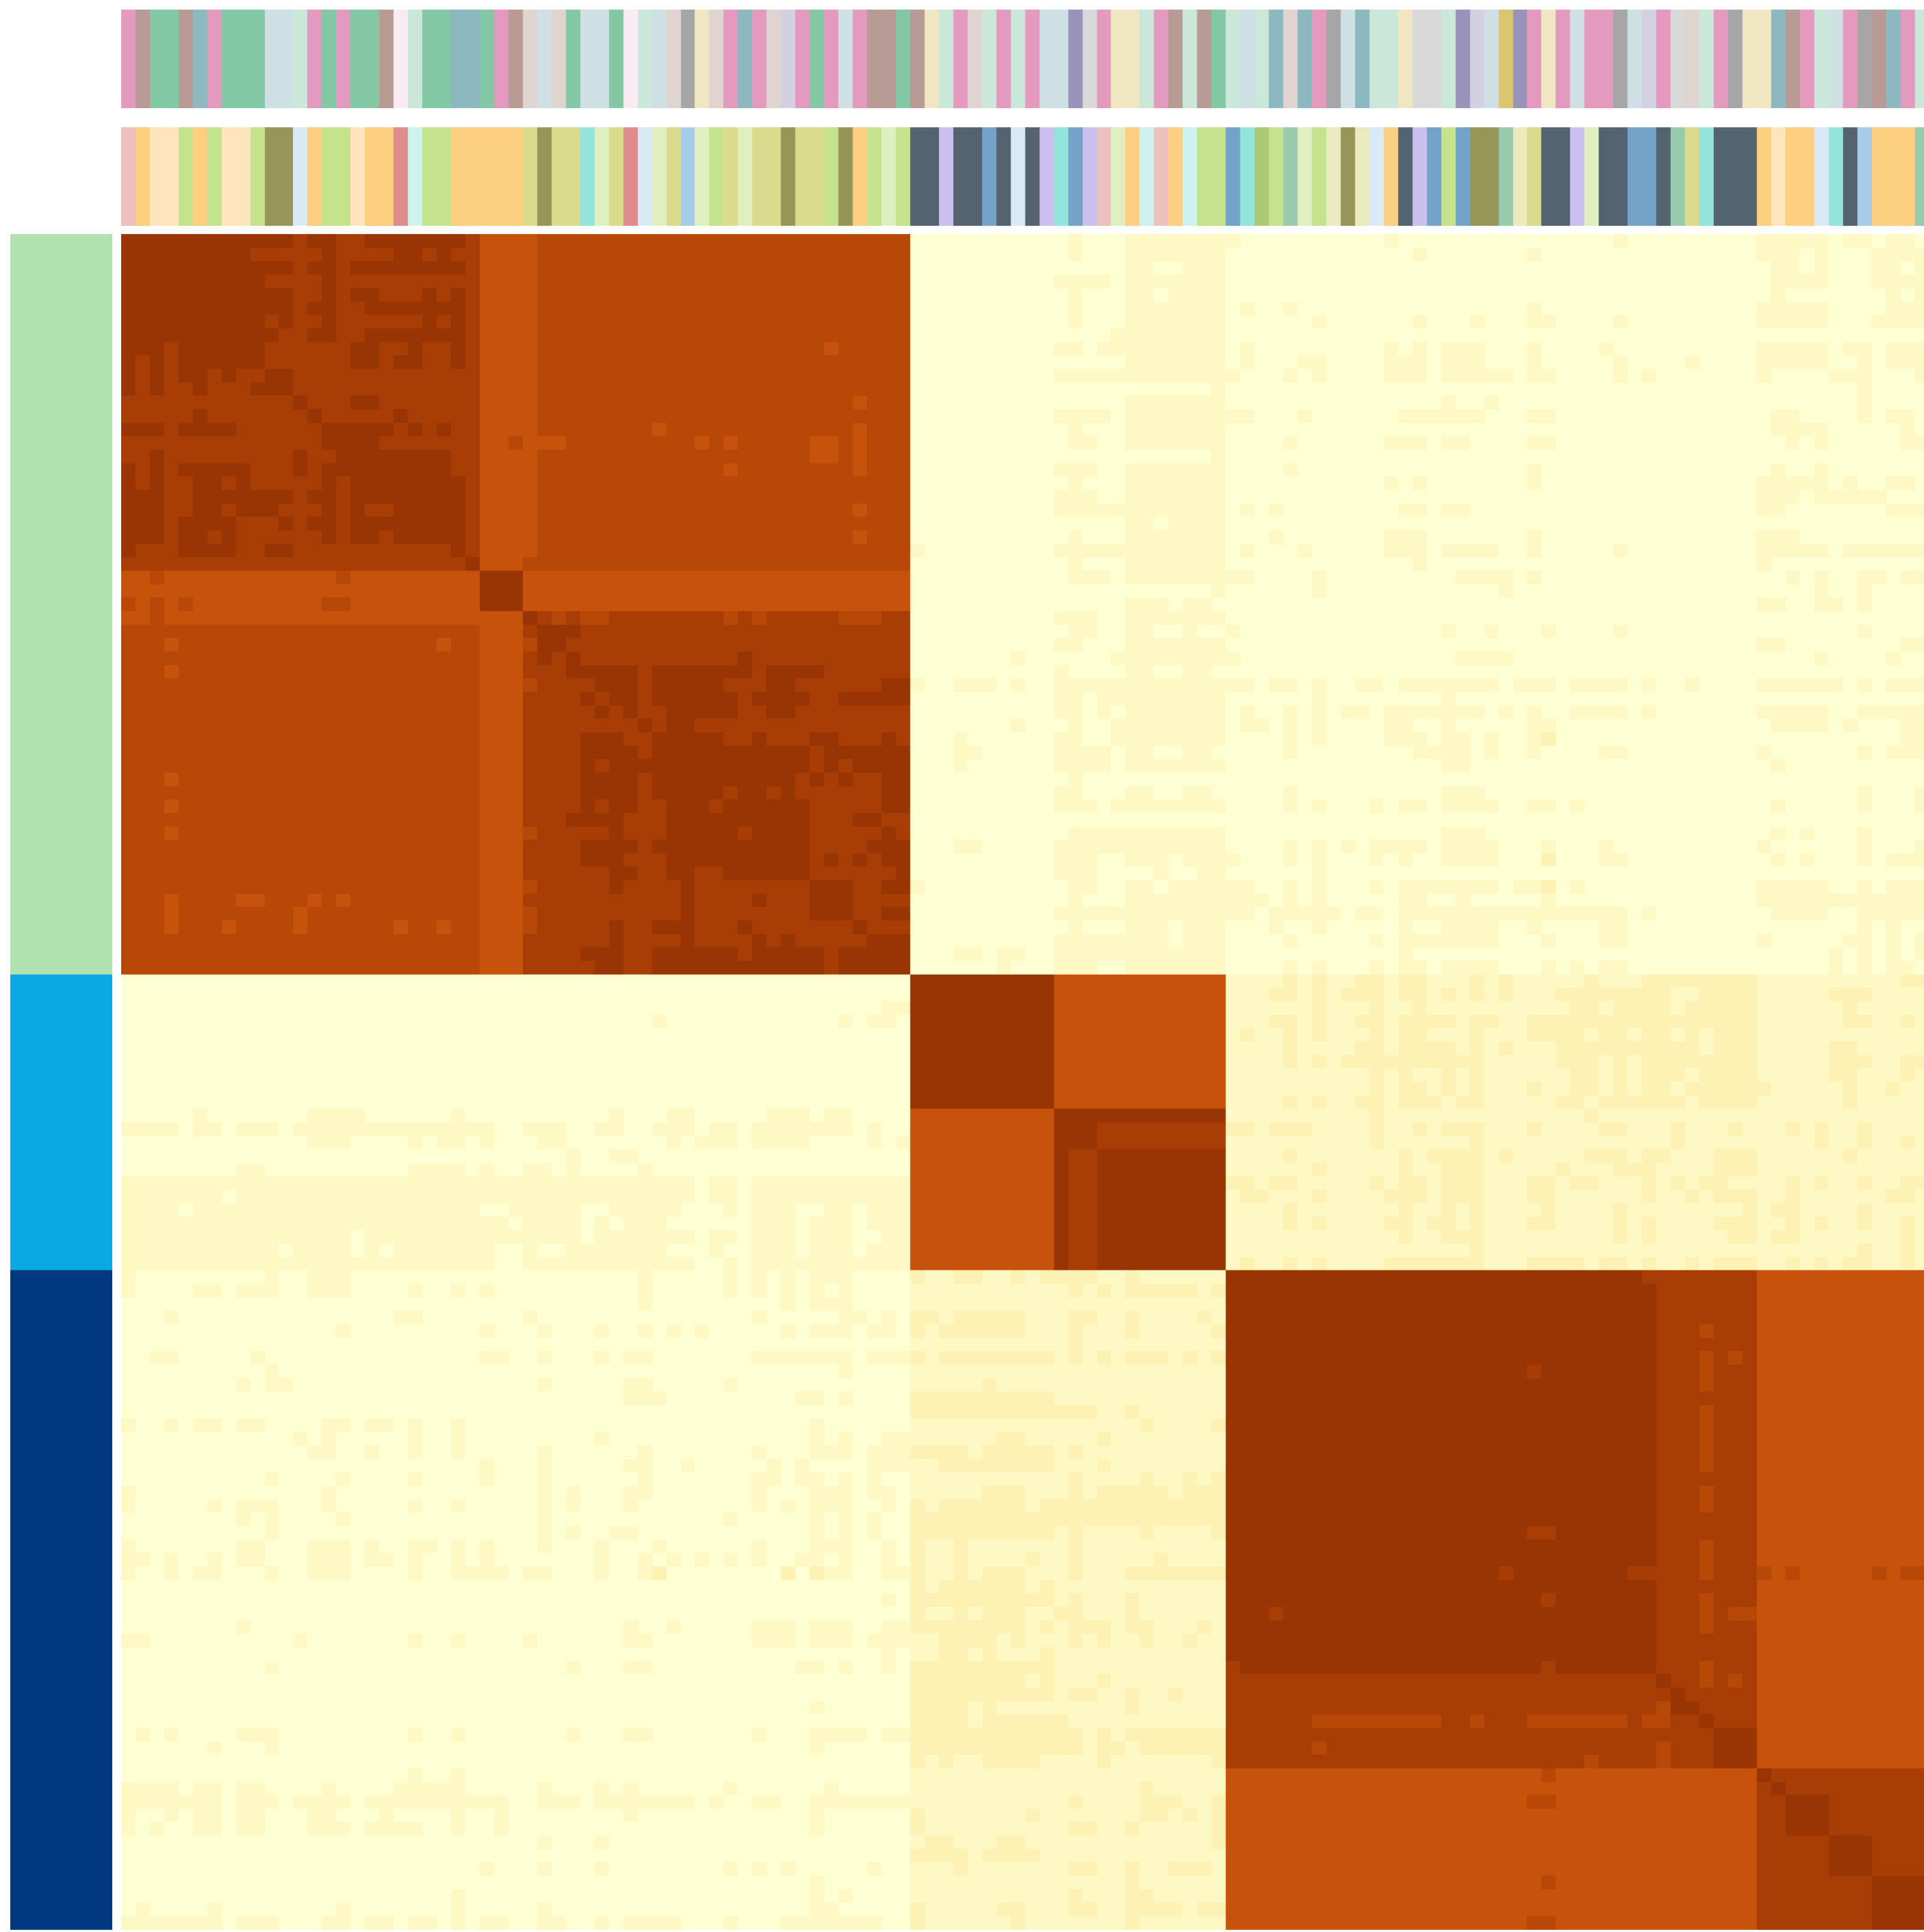

Subject ID

Body site

**Body site**

- Ea
- Ocb
- Gb
- Ra
- Al
- Ba
- Mb
- N
- Ax
- Ac
- Um
- Ic
- Gc
- Pc
- Ph
- Tw
- Hp
- Vf

**Subject ID**

- HV1
- HV2
- HV3
- HV4
- HV6
- HV7
- HV8
- HV9
- HV21
- HV22
- HV23
- HV24
- HV25
- HV29

**Species**

- *S. epidermidis*
- *S. capitis*
- *S. hominis*

SHNIH036  
SHNIH023  
SHNIH055  
SHNIH054  
SHNIH025  
SHNIH014  
SHNIH034  
SHNIH053  
SHNIH052  
SHNIH039  
SHNIH009  
SHNIH010  
SHNIH003  
SHNIH033  
SHNIH042  
SHNIH035  
SHNIH051  
SHNIH038  
SHNIH024  
SHNIH048  
SHNIH002  
SHNIH043  
SHNIH045  
SHNIH016  
SHNIH015  
SHNIH046  
SHNIH030  
SHNIH022  
SHNIH018  
SHNIH008  
SHNIH020  
SHNIH040  
SHNIH006  
SHNIH004  
SHNIH037  
SHNIH049  
SHNIH012  
SHNIH005  
SHNIH019  
SHNIH011  
SHNIH050  
SHNIH017  
SHNIH029  
SHNIH013  
SHNIH028  
SHNIH021  
SHNIH001  
SHNIH031  
SHNIH041  
SHNIH027  
SHNIH007  
SHNIH032  
SHNIH026  
SHNIH047  
SHNIH044  
SCNIH013  
SCNIH006  
SCNIH003  
SCNIH015  
SCNIH022  
SCNIH007  
SCNIH018  
SCNIH008  
SCNIH019  
SCNIH004  
SCNIH005  
SCNIH009  
SCNIH010  
SCNIH017  
SCNIH020  
SCNIH011  
SCNIH016  
SCNIH012  
SCNIH002  
SCNIH014  
SCNIH021  
SENIH025  
SENIH006  
NIHLM049  
SENIH011  
SENIH022  
SENIH032  
SENIH040  
SENIH021  
NIHLM018  
SENIH013  
SENIH027  
SENIH010  
SENIH016  
SENIH034  
SENIH033  
SENIH003  
NIHLM070  
NIHLM003  
SENIH008  
SENIH023  
NIHLM067  
SENIH041  
SENIH015  
SENIH043  
SENIH039  
SENIH048  
NIHLM039  
NIHLM008  
NIHLM001  
SENIH044  
NIHLM087  
SENIH049  
SENIH029  
SENIH045  
NIHLM040  
SENIH017  
SENIH036  
NIHLM031  
SENIH037  
SENIH046  
NIHLM057  
NIHLM015  
SENIH042  
NIHLM037  
SENIH036  
NIHLM023  
SENIH047  
NIHLM061

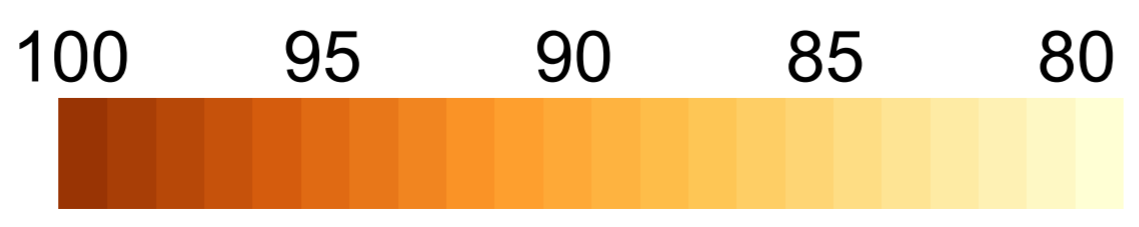

NIHLM067  
SENIH017  
NIHLM023  
NIHLM036  
NIHLM037  
SENIH042  
NIHLM015  
NIHLM057  
SENIH039  
NIHLM031  
SENIH037  
SENIH046  
NIHLM057  
NIHLM015  
SENIH042  
NIHLM037  
SENIH036  
NIHLM023  
SENIH047  
NIHLM061

**Figure S4. Heat-map of pairwise fastANI comparison of de-replicated, non-clonal genomes of *S. epidermidis*, *S. capitis*, and *S. hominis*.**

Colored bars on the top denote the healthy volunteer and body site of isolation of each labeled genome. Species are denoted by the side bar on the left. Refer to Fig. S1 for body site details.

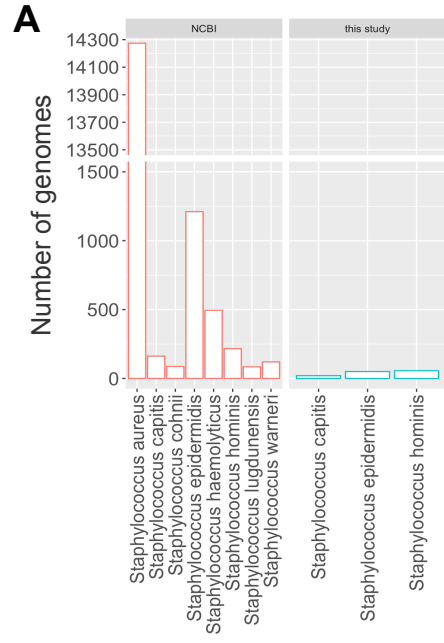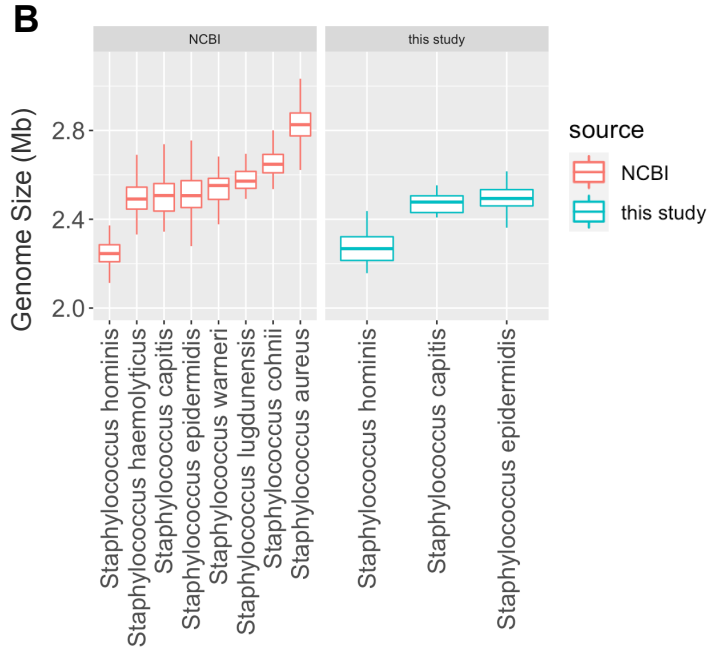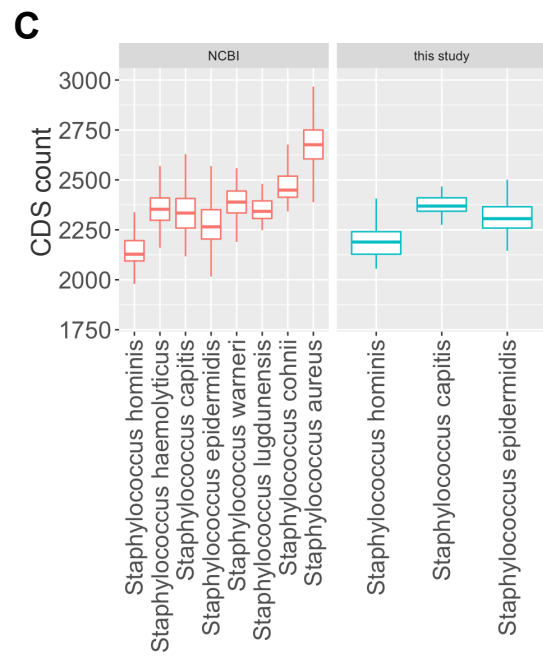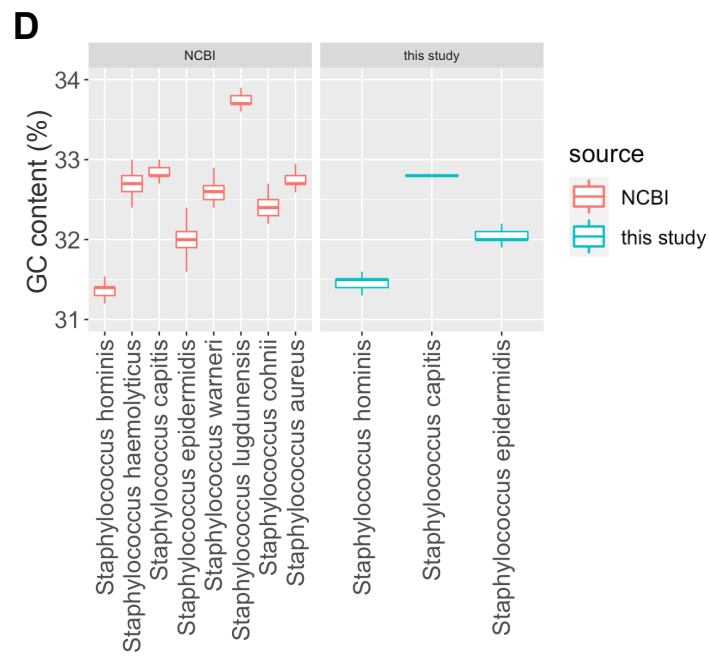

**Figure S5. Boxplot representing genome characteristics of isolates used in the current study and comparing them to species-specific genomes present in NCBI.**

**(A)** Number of genomes of different species that were either present in the NCBI or were sequenced for this study. **(B)** Average genome sizes of each species. **(C)** Average number of protein-coding genes (CDS) that were present in the genome of each species. **(D)** Percent GC content of each species.

The center line within each boxplot represents the median value, with edges showing the first and third quartiles.

**A**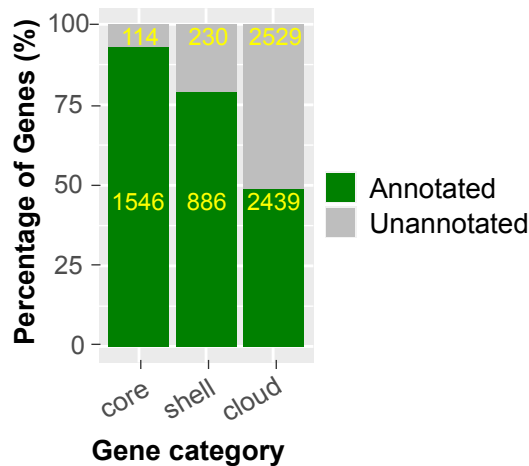**B**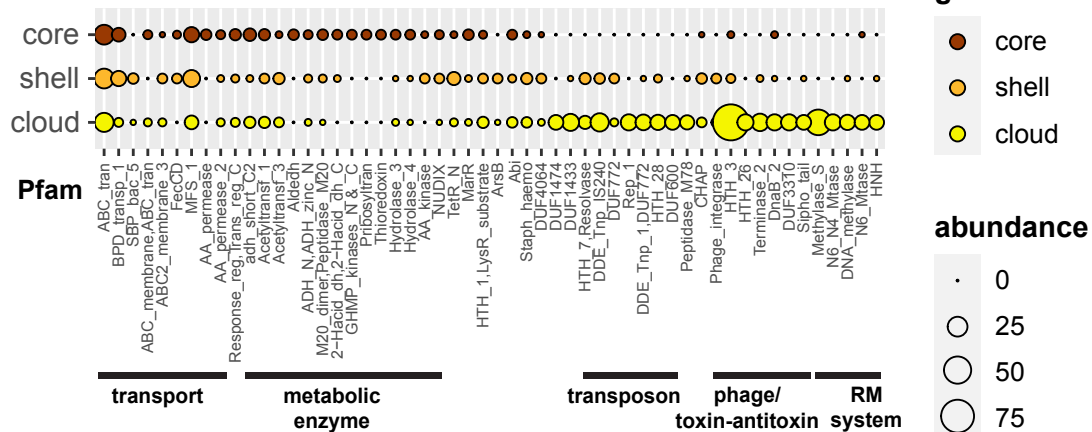**C**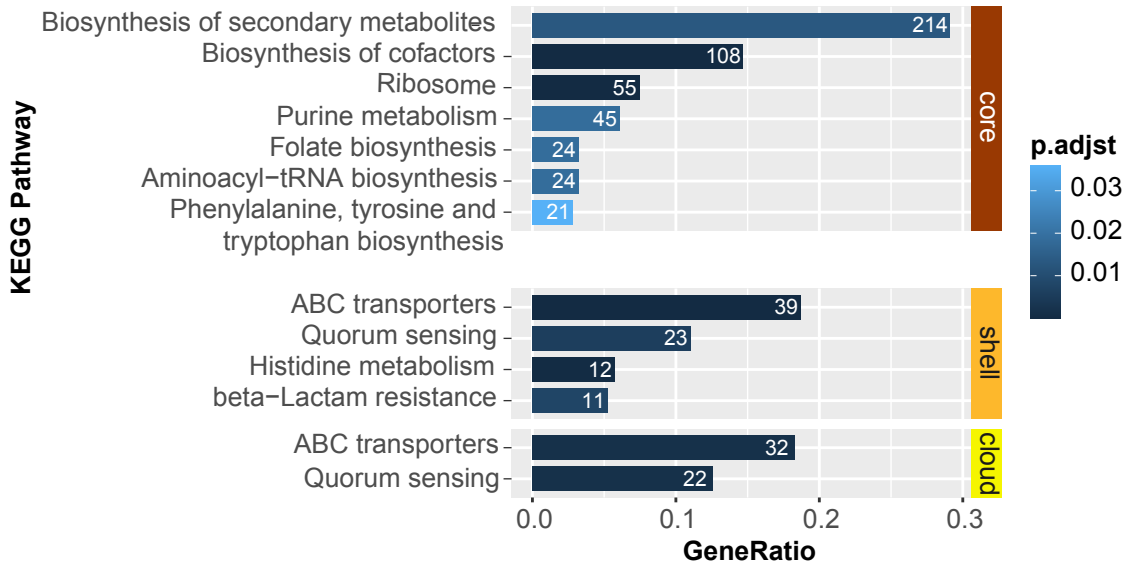

**Figure S6. Functional annotation of genus pan-genome.**

**(A)** Percentage of annotated genes shown by genus pan-genomic category. Actual number of genes in each group are shown in yellow inside each bar. **(B)** Combined data showing top 20 most represented Pfam domains in each pan-genomic category. Size of the bubbles represents the actual number of genes carrying the Pfam domain annotation within each category. **(C)** KEGG pathway enrichment analysis of genes in each category using KEGG KO identifiers.



**Figure S7. Phylogenetic tree of all 126 staphylococcal genomes based on the polymorphic sites detected in sequence alignment of select core genes (N = 665).**

Bootstrap values of at least 80 percent are shown with red dots. For each species-level phylogenetic tree shown in Figure 5, the other two species served as an outgroup for rooting the tree based on this genus-level tree. Body site, healthy volunteer, and species of each genome are shown as sidebars. Refer to Fig. S1 for body site details.



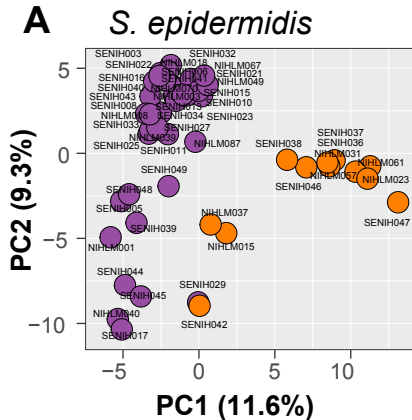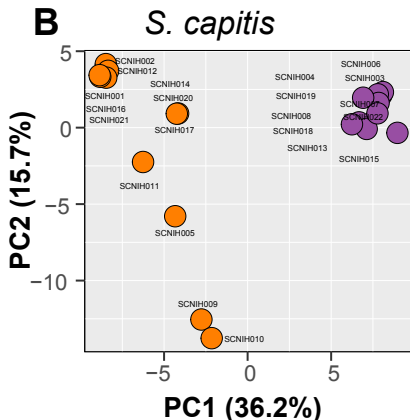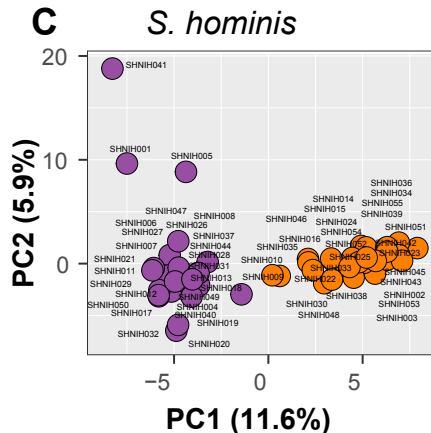

● Clade A    ● Clade B

**Figure S8. Phylogenetic tree of all 126 staphylococcal genomes based on the polymorphic sites detected in sequence alignment of select core genes (N = 665).**

Bootstrap values of at least 80 percent are shown with red dots. For each species-level phylogenetic tree shown in Figure 5, the other two species served as an outgroup for rooting the tree based on this genus-level tree. Body site, healthy volunteer, and species of each genome are shown as sidebars. Refer to Fig. S1 for body site details.



**Figure S9 Hierarchical clustering of variance stabilizing transformation-normalized reads for 1647 genus-core genes from all RNA-seq samples (Euclidean distance; Ward).**

The x-axis represents sample clusters, and the y-axis represents the distances between samples. Colors depict different growth media. Red: ES, Green: ESL, and Blue is BHI-YE. Samples clustered by species (shown as labels) and by growth medium.

## Genes

- Up-regulated
- Down-regulated
- Not-differentially expressed
- Not significant

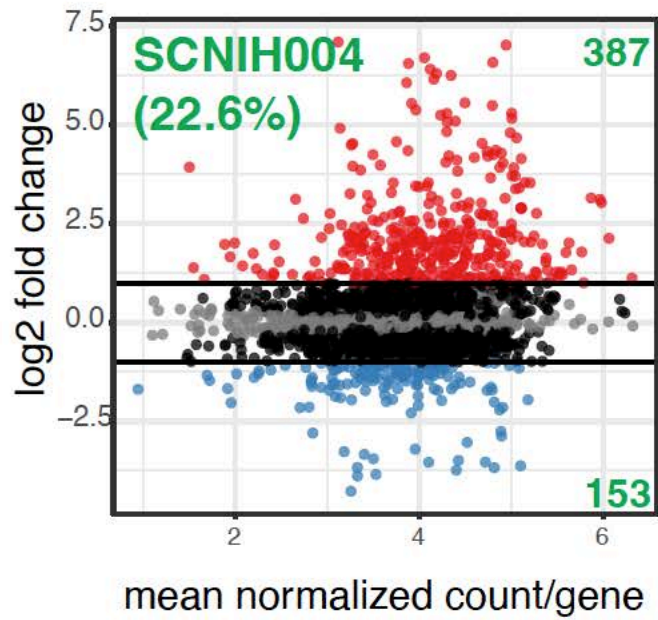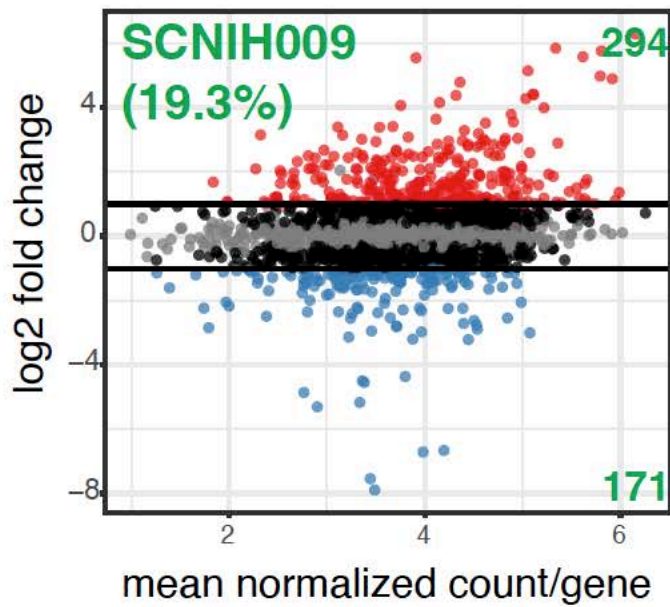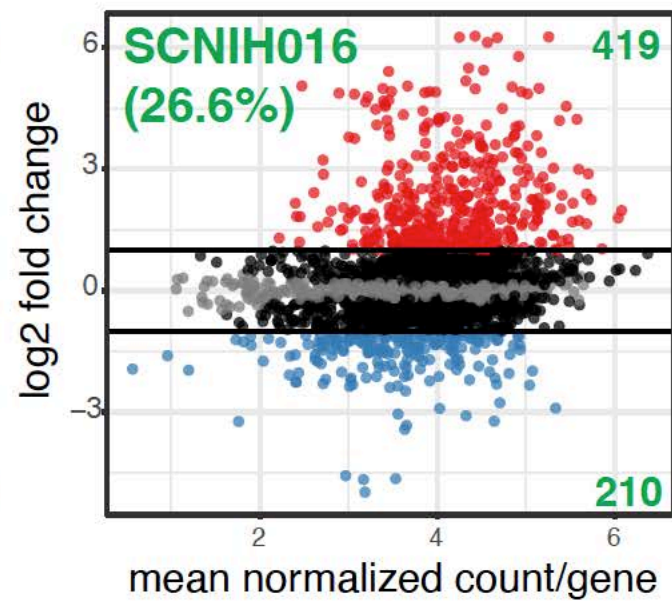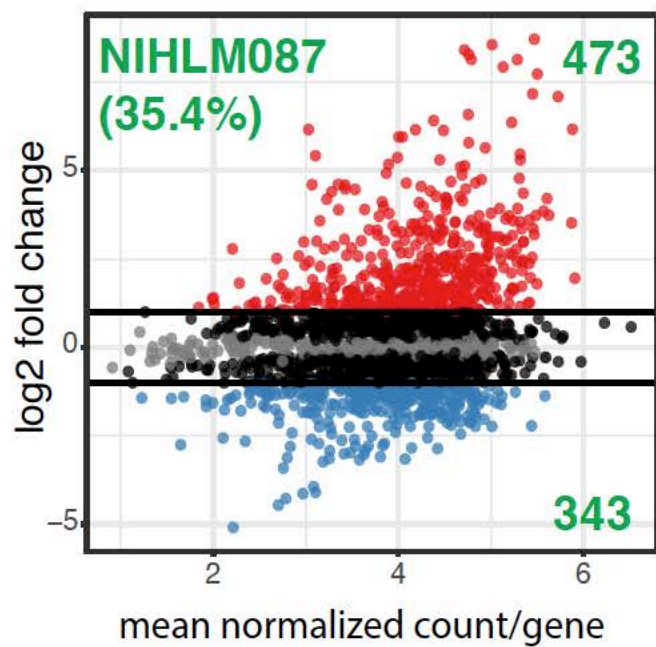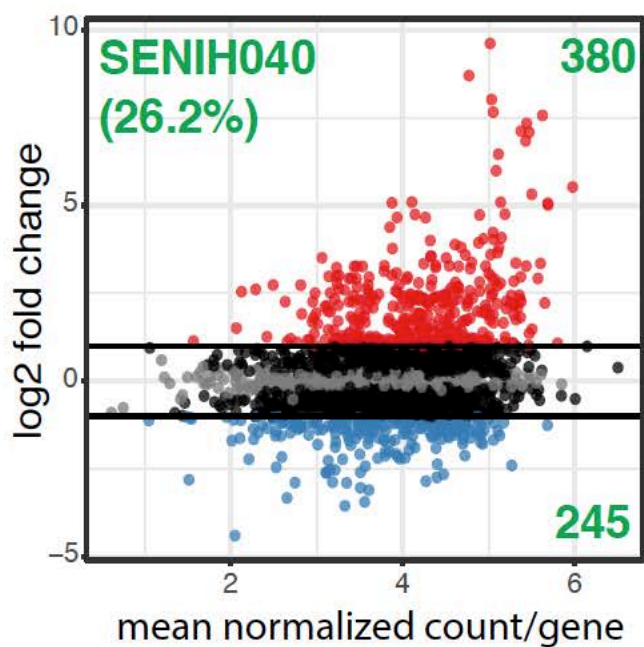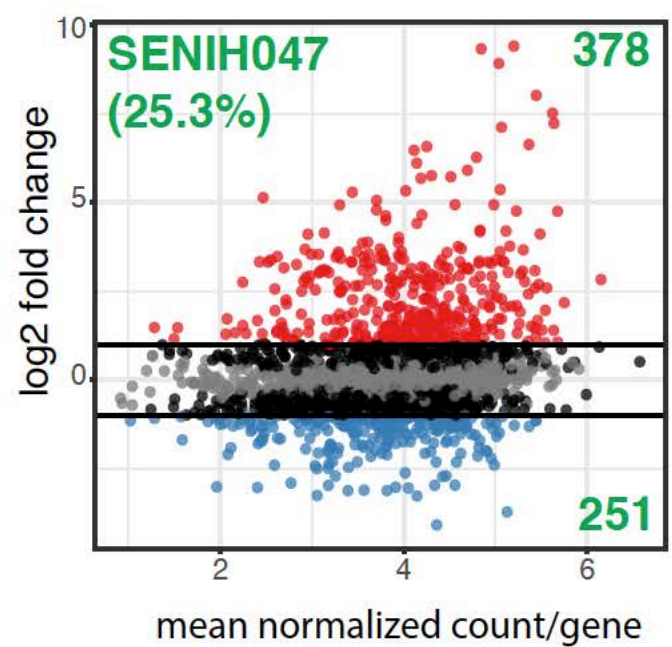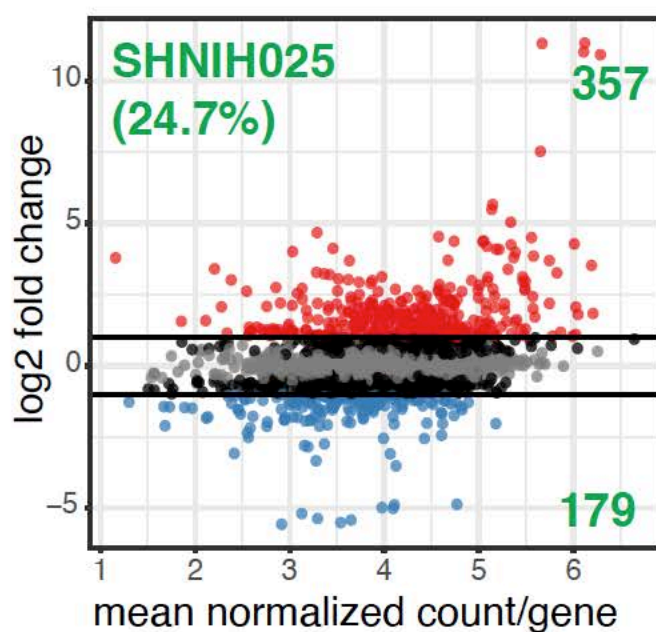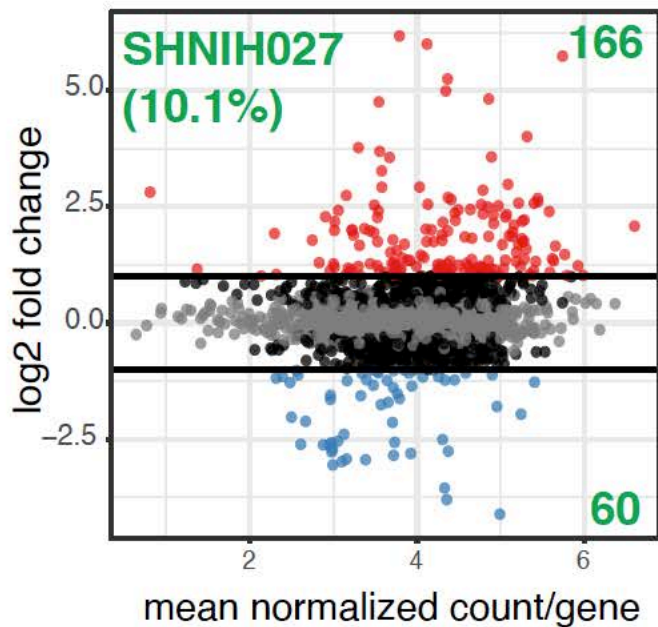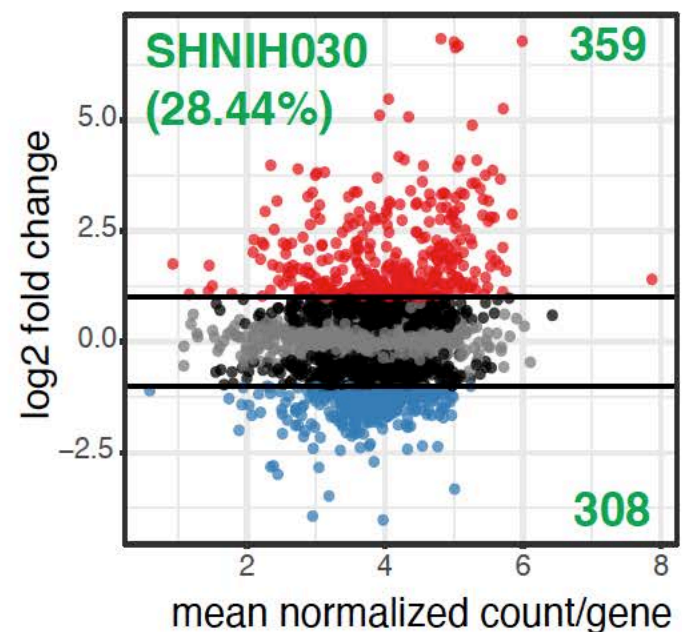

**Figure S10 Differential gene expression plot for each isolate.**

Each box represents the fold change in expression of each gene in the ES medium relative to BHI-YE for each isolate plotted against the mean normalized count per gene. Red dots represent upregulated genes, blue represent downregulated genes ( $\geq$  or  $\leq$  2-fold change, adjusted P value < 0.05, DESeq). The actual number of upregulated (top) and downregulated (bottom) genes is shown in green. The numbers shown in green inside brackets placed below each isolate label represent the percentage of genes within a genome that were differentially regulated in the ES medium relative to BHI-YE.

**Supplementary Table 1 – Prevalence and mean relative abundance of skin-resident staphylococcal species based on 16S rRNA amplicon analysis.**

| Species                      | Mean Percent Relative Abundance* $\pm$ Standard Deviation | Prevalence by subjects (n = 22) (%) | Prevalence by samples (n = 298) (%) |
|------------------------------|-----------------------------------------------------------|-------------------------------------|-------------------------------------|
| <i>S. epidermidis</i>        | 52.25 $\pm$ 1.87                                          | 22 (100)                            | 284 (95.30)                         |
| <i>S. capitis</i>            | 26.37 $\pm$ 1.77                                          | 22 (100)                            | 225 (75.50)                         |
| <i>S. hominis</i>            | 23.65 $\pm$ 1.82                                          | 22 (100)                            | 208 (69.80)                         |
| <i>S. warneri</i>            | 8.27 $\pm$ 1.23                                           | 22 (100)                            | 121 (40.60)                         |
| <i>S. lugdunensis</i>        | 3.98 $\pm$ 1.69                                           | 17 (77)                             | 31 (10.40)                          |
| <i>S. haemolyticus</i>       | 6.27 $\pm$ 1.49                                           | 16 (73)                             | 53 (17.79)                          |
| <i>S. auricularis</i>        | 30.79 $\pm$ 7.03                                          | 13 (59)                             | 27 (9.06)                           |
| <i>S. cohnii</i>             | 12.19 $\pm$ 3.25                                          | 13 (59)                             | 35 (11.74)                          |
| <i>S. pettenkoferi</i>       | 9.19 $\pm$ 1.92                                           | 9 (41)                              | 19 (6.38)                           |
| <i>S. aureus</i>             | 8.44 $\pm$ 2.83                                           | 8 (36)                              | 17 (5.70)                           |
| <i>S. saccharolyticus</i>    | 16.32 $\pm$ 3.47                                          | 6 (27)                              | 31 (10.40)                          |
| <i>S. epidermidis</i> group  | 16.03 $\pm$ 2.88                                          | 6 (27)                              | 27 (9.06)                           |
| <i>S. saprophyticus</i>      | 0.84 $\pm$ 0.28                                           | 6 (27)                              | 8 (2.68)                            |
| <i>S. simulans</i>           | 3.31 $\pm$ 1.14                                           | 5 (23)                              | 6 (2.01)                            |
| <i>S. pasteurii</i>          | 3.26 $\pm$ 1.06                                           | 5 (23)                              | 14 (4.70)                           |
| <i>S. haemolyticus</i> group | 4.48 $\pm$ 1.35                                           | 4 (18)                              | 13 (4.36)                           |
| <i>S. petraei</i>            | 0.86 $\pm$ 0.22                                           | 4 (18)                              | 7 (2.35)                            |

\*Mean percent relative abundance of each species was calculated using only those samples that were positive for the given species (range: minimum 3 reads to maximum 12119 reads).

**Supplementary Table 5 – Genus-core genes with predicted role in skin colonization**

| Gene ID                    | Genes                   | Function                                                      | Role in skin colonization                                         |
|----------------------------|-------------------------|---------------------------------------------------------------|-------------------------------------------------------------------|
| S0510                      | <i>srtA</i>             | covalent anchoring of adhesins to the bacterial cell wall     | bacterial adhesion, biofilm formation, and immune escape (1)      |
| S1463, S0384, S0385, S1644 | <i>dltABCD</i>          | D-alanylation of teichoic acids                               | Resistance to host antimicrobial peptides (2)                     |
| S0319                      | <i>mprF</i>             | phospholipid lysylation                                       | Resistance to host antimicrobial peptides (3)                     |
| S0957                      | <i>sepA</i>             | protease                                                      | AMP degradation (4)                                               |
| S1750, S1576               | <i>vraF, vraG</i>       | AMP export                                                    | Resistance to host antimicrobial peptides (5)                     |
| S1493, S1721, S1590        | <i>graR, graS, graX</i> | Aps system                                                    | AMP sensor, regulator of AMP resistance mechanisms (6)            |
| S0518- S0520               | <i>capABC</i>           | Poly-γ-DL-glutamate capsule biosynthesis                      | Protects from AMPs, phagocytosis, and high salt concentration (7) |
| S1387                      | <i>oatA</i>             | O-acetylates peptidoglycan                                    | Lysozyme resistance (8)                                           |
| S0663                      | <i>vraX</i>             | binds host complement protein                                 | Inhibit classical complement pathway (9)                          |
| S1611                      | <i>atlE</i>             | Bifunctional autolysin/adhesin                                | biofilm formation, vitronectin binding (10)                       |
| S1620, S1526, S1030, S1031 | <i>pmtABCD</i>          | ABC transporter for all Phenol-soluble modulins (PSM) classes | Virulence, biofilm (11)                                           |
| S0455, S1812               | -                       | Phenol-soluble modulins-beta                                  | promote biofilm maturation and dissemination (12)                 |



|                                                          |                                     |                                                            |                                                               |
|----------------------------------------------------------|-------------------------------------|------------------------------------------------------------|---------------------------------------------------------------|
| S0624, S0625,<br>S1613, S1766,<br>S0626, S0627,<br>S1813 | <i>tagDXBGHA</i>                    | poly-glycerol-<br>phosphate<br>teichoic acids<br>synthesis | Role in nasal colonization (13)                               |
| S1337                                                    | <i>gehC</i>                         | lipase                                                     | establish residence in the hair<br>follicles (14)             |
| S0557                                                    | <i>betA</i>                         | Choline<br>dehydrogenase                                   | biosynthesis of the<br>osmoprotectant glycine betaine<br>(15) |
| S0487, S0486,<br>S0485, S1232                            | <i>opuCABCD</i>                     | Glycine<br>betaine/choline/c<br>arnitine transport         | Osmoprotolerance (16)                                         |
| S1313, S0867-<br>S0872<br>S0873                          | <i>ureABCEFGD</i><br><br><i>yut</i> | urease-<br>production<br><br>urea transport                | acid response and pH<br>homeostasis (17)                      |
| S0947- S0949                                             | <i>yfmCDE</i>                       | ferric citrate<br>transporter                              | Iron acquisition (18)                                         |
| S0951                                                    | <i>isdG</i>                         | liberates iron from<br>host heme                           | Iron acquisition (19)                                         |

**Supplementary Table 8. Composition of artificial skin media** ([www.pickeringlabs.com/](http://www.pickeringlabs.com/))

**1. Eccrine Sweat (ES):**

Artificial Eccrine Perspiration (pH 5.5); Catalog Number: 1700-0023

**Amino Acids**

Concentrations for listed amino acids range from 0.002 g/L (for Taurine) to 0.30 g/L (for Serine)

- Glycine
- L-Alanine
- L-Arginine
- L-Asparagine
- L-Aspartic acid
- L-Citrulline
- L-Glutamic acid
- L-Histidine
- L-Isoleucine
- L-Leucine
- L-Lysine as hydrochloride
- L-Methionine
- L-Ornithine as hydrochloride
- L-Phenylalanine
- L-Serine (Largest amount)
- L-Threonine
- L-Tyrosine
- L-Valine
- Taurine

**Metabolites**

Concentration for listed metabolites range from 0.015 g/L (for Uric Acid) to 1.74 g/L (for Urea)

- Uric acid
- Urea
- Lactic acid
- Ammonia

**Minerals**

- Sodium – 33 mmole/L
- Zinc – 11.21  $\mu$ mole/L
- Chloride – 80.34 mmole/L
- Calcium – 5.49 mmole/L
- Iron – 4.62  $\mu$ mole/L
- Magnesium – 1.67 mmole/L
- Potassium – 33 mmole/L
- Sulfate – 2.57 mmole/L

2. **Eccrine Sweat with lipids (ESL):** This medium was prepared using ES medium as the base. Tween 80 was added at 0.1%. The following sebum/apocrine emulsion was added at 1% for final growth curves.

**Apocrine sweat:** emulsion of sebum plus other ingredients. Catalog Number 1700-0556

| Compound                                             | Concentration (g/L) |
|------------------------------------------------------|---------------------|
| L-Alanine                                            | 0.1-0.5             |
| L-Aspartic acid                                      | 0.01-0.1            |
| L-Citrulline                                         | 0.1-0.5             |
| L-Glutamic acid                                      | 0.5 -2              |
| L-Glutamine                                          | 0.1-0.5             |
| Glycine                                              | 0.1-0.5             |
| L-isoIeucine                                         | 0.1-0.5             |
| L-Leucine                                            | 0.1-0.5             |
| L-Lysine                                             | 0.5-2               |
| L-Phenylalanine                                      | 0.01-0.1            |
| L-Proline                                            | 0.1-0.5             |
| L-Serine                                             | 0.1-0.5             |
| L-Threonine                                          | 0.1-0.5             |
| L-Tryptophan                                         | 0.1-0.5             |
| L-Tyrosine                                           | 0.01-0.1            |
| L-Valine                                             | 0.1-0.5             |
| Creatine                                             | 0.01-0.1            |
| Urea                                                 | 0.2-2               |
| Citric acid                                          | 0.1-0.5             |
| Formic Acid                                          | 0.01-0.1            |
| Lactic Acid                                          | 0.5 - 2             |
| Glucose                                              | 0.01-0.1            |
| Butyric acid                                         | 2-3                 |
| Valeric acid                                         | 2-3                 |
| a-hydroxy-n-butyric acid-sodium salt                 | 0.01-0.1            |
| 3-hydroxybutyric acid                                | 0.01-0.1            |
| a-hydroxy-iso-butyric acid                           | 0.1-0.5             |
| (NH <sub>4</sub> ) <sub>2</sub> SO <sub>4</sub>      | 0.1-0.5             |
| CaCl <sub>2</sub> *2H <sub>2</sub> O                 | 0.5 - 2             |
| CuSO <sub>4</sub> *5H <sub>2</sub> O                 | 0.001-0.01          |
| Fe(NO <sub>3</sub> ) <sub>3</sub> *9H <sub>2</sub> O | 0.001-0.01          |
| MgCl <sub>2</sub> *6H <sub>2</sub> O                 | 0.1-0.5             |
| NaCl                                                 | 0.5 - 2             |
| ZnCl <sub>2</sub>                                    | 0.001-0.01          |

**Sebum components**

- Palmitic acid (CAS# 57-10-3): 0.5 % w/v

- Stearic acid (CAS# 57-11-4): 0.25% w/v
- Oleic Acid (CAS# 112-80-1): 0.9 % w/v
- Linoleic acid (CAS# 60-33-3): 0.25% w/v
- Coconut oil (CAS# 8001-31-8): 0.75 % w/v
- Olive oil (CAS# 800-25-0): 1% w/v
- Paraffin Wax (CAS# 8002-74-2): 0.5 % w/v
- Synthetic Spermacetti: 0.75% w/v
- Squalene (CAS# 111-02-4): 0.25% w/v
- Cholesterol (CAS# 57-88-5): 0.25% w/v
- Triethanolamine (CAS#102-71-6): 0.8% w/v

**Supplementary Table 9. Distribution of differentially expressed genes in ES medium relative to BHI-YE between core and accessory gene partitions**

Differentially expressed genes = Fold change  $\geq$  or  $\leq$  2, adjusted P value < 0.05

| Species               | Isolate  | No. of genus-core genes | Percent (%) | No. of species-restricted core genes | Percent (%) | No. of accessory genes | Percent (%) |
|-----------------------|----------|-------------------------|-------------|--------------------------------------|-------------|------------------------|-------------|
| <i>S. epidermidis</i> | NIHLM087 | 583                     | 72          | 149                                  | 18          | 81                     | 10          |
|                       | SENIH040 | 428                     | 70          | 107                                  | 17          | 78                     | 13          |
|                       | SENIH047 | 398                     | 64          | 119                                  | 19          | 104                    | 17          |
| <i>S. capitis</i>     | SCNIH004 | 345                     | 66          | 149                                  | 29          | 28                     | 5           |
|                       | SCNIH009 | 268                     | 58          | 131                                  | 29          | 62                     | 13          |
|                       | SCNIH016 | 438                     | 70          | 172                                  | 27          | 18                     | 3           |
| <i>S. hominis</i>     | SHNIH025 | 371                     | 70          | 70                                   | 13          | 92                     | 17          |
|                       | SHNIH027 | 166                     | 74          | 32                                   | 14          | 26                     | 12          |
|                       | SHNIH030 | 463                     | 70          | 85                                   | 13          | 115                    | 17          |

## Datasets in Excel format

**Supplementary Table 2.** Genome statistics of isolates used in the current study

**Supplementary Table 3.** Gene presence absence matrix based on individual species pan-genome

**Supplementary Table 4.** Gene presence absence matrix of merged genus pan-genome

**Supplementary Table 6.** List of species-restricted core genes detected in genus pan-genome.

**Supplementary Table 7.** pan-GWAS analysis showing clade-specific gene enrichment in each species

**Supplementary Table 10.** List of differentially expressed genes in the ES medium relative to BHI-YE per isolate

## SI References

1. S. Cascioferro, M. Totsika, D. Schillaci, Sortase A: an ideal target for anti-virulence drug development. *Microb Pathog* **77**, 105-112 (2014).
2. A. Peschel *et al.*, Inactivation of the *dlt* operon in *Staphylococcus aureus* confers sensitivity to defensins, protegrins, and other antimicrobial peptides. *J Biol Chem* **274**, 8405-8410 (1999).
3. A. Peschel *et al.*, *Staphylococcus aureus* resistance to human defensins and evasion of neutrophil killing via the novel virulence factor MprF is based on modification of membrane lipids with l-lysine. *J Exp Med* **193**, 1067-1076 (2001).
4. Y. Lai *et al.*, The human anionic antimicrobial peptide dermcidin induces proteolytic defence mechanisms in staphylococci. *Mol Microbiol* **63**, 497-506 (2007).
5. M. Falord, G. Karimova, A. Hiron, T. Msadek, GraXSR proteins interact with the VraFG ABC transporter to form a five-component system required for cationic antimicrobial peptide sensing and resistance in *Staphylococcus aureus*. *Antimicrob Agents Chemother* **56**, 1047-1058 (2012).
6. M. Li *et al.*, The antimicrobial peptide-sensing system *aps* of *Staphylococcus aureus*. *Mol Microbiol* **66**, 1136-1147 (2007).
7. S. Kocianova *et al.*, Key role of poly-gamma-DL-glutamic acid in immune evasion and virulence of *Staphylococcus epidermidis*. *J Clin Invest* **115**, 688-694 (2005).
8. A. Bera, S. Herbert, A. Jakob, W. Vollmer, F. Gotz, Why are pathogenic staphylococci so lysozyme resistant? The peptidoglycan O-acetyltransferase OatA is the major determinant for lysozyme resistance of *Staphylococcus aureus*. *Mol Microbiol* **55**, 778-787 (2005).
9. J. Yan *et al.*, *Staphylococcus aureus* VraX specifically inhibits the classical pathway of complement by binding to C1q. *Mol Immunol* **88**, 38-44 (2017).
10. C. Heilmann, M. Hussain, G. Peters, F. Gotz, Evidence for autolysin-mediated primary attachment of *Staphylococcus epidermidis* to a polystyrene surface. *Mol Microbiol* **24**, 1013-1024 (1997).
11. S. S. Chatterjee *et al.*, Essential *Staphylococcus aureus* toxin export system. *Nat Med* **19**, 364-367 (2013).
12. R. Wang *et al.*, *Staphylococcus epidermidis* surfactant peptides promote biofilm maturation and dissemination of biofilm-associated infection in mice. *J Clin Invest* **121**, 238-248 (2011).
13. V. Winstel, P. Sanchez-Carballo, O. Holst, G. Xia, A. Peschel, Biosynthesis of the unique wall teichoic acid of *Staphylococcus aureus* lineage ST395. *mBio* **5**, e00869 (2014).
14. K. Nakamura, M. R. Williams, J. M. Kwiecinski, A. R. Horswill, R. L. Gallo, *Staphylococcus aureus* Enters Hair Follicles Using Triacylglycerol Lipases Preserved through the Genus *Staphylococcus*. *J Invest Dermatol* **141**, 2094-2097 (2021).
15. J. E. Graham, B. J. Wilkinson, *Staphylococcus aureus* osmoregulation: roles for choline, glycine betaine, proline, and taurine. *J Bacteriol* **174**, 2711-2716 (1992).

16. D. Casey, R. D. Sleator, A genomic analysis of osmotolerance in *Staphylococcus aureus*. *Gene* **767**, 145268 (2021).
17. C. Zhou *et al.*, Urease is an essential component of the acid response network of *Staphylococcus aureus* and is required for a persistent murine kidney infection. *PLoS Pathog* **15**, e1007538 (2019).
18. V. Braun, C. Herrmann, Docking of the periplasmic FecB binding protein to the FecCD transmembrane proteins in the ferric citrate transport system of *Escherichia coli*. *J Bacteriol* **189**, 6913-6918 (2007).
19. K. P. Haley, E. M. Janson, S. Heilbronner, T. J. Foster, E. P. Skaar, *Staphylococcus lugdunensis* IsdG liberates iron from host heme. *J Bacteriol* **193**, 4749-4757 (2011).
